# Supplementary material for: Origin of the Laurentian Great Lakes fish fauna through upward adaptive radiation cascade prior to the Last Glacial Maximum
Source: Research Square preprint supplement (doi:10.21203/rs.3.rs-2978383/v1), 2023-08-01
Supplement: Supplementary file 1 [file 767f930e38f5ec915471d10b.docx]

**SUPPLEMENTARY FIGURES AND TABLES**

**Table S1** – Collection locations and resequencing statistics for *Coregonus artedi* (CA), *C. hoyi* (CH), *C. kiyi* (CK), and *C. nigripinnis* (CN) samples. Resequencing statistics for each individual include total number of reads, average sequencing depth, breadth of the reference genome covered, the percentage of reads that aligned to the reference, and the percent of paired end reads that are correctly oriented to one another.

|  |  |  |  |  |  |  |  |
| --- | --- | --- | --- | --- | --- | --- | --- |
| Sample | latitude | longitude | read count | average depth | breadth of coverage% | alignment% | proper pair% |
| CA01 | 46.80628 | -90.78238 | 216,228,232 | 14.51 | 84.03 | 95.78 | 87.51 |
| CA02 | 46.95411 | -90.47148 | 195,120,830 | 13.26 | 84.23 | 95.39 | 86.32 |
| CA03 | 46.95411 | -90.47148 | 215,793,796 | 14.47 | 84.00 | 96.02 | 88.19 |
| CA04 | 46.95411 | -90.47148 | 193,652,272 | 13.02 | 83.76 | 95.62 | 87.67 |
| CH01 | 46.89205 | -90.53256 | 198,414,328 | 13.26 | 84.00 | 95.86 | 86.88 |
| CH02 | 46.88541 | -91.21529 | 192,030,676 | 12.84 | 83.78 | 95.57 | 87.29 |
| CH03 | 46.88541 | -91.21529 | 195,800,072 | 13.21 | 83.77 | 95.53 | 87.41 |
| CH04 | 46.88541 | -91.21529 | 210,419,234 | 14.06 | 83.96 | 96.83 | 88.28 |
| CK01 | 46.89205 | -90.53256 | 193,206,744 | 12.96 | 83.86 | 96.23 | 87.37 |
| CK02 | 47.49668 | -89.99913 | 195,395,138 | 13.20 | 83.79 | 95.9 | 87.71 |
| CK03 | 47.15712 | -89.96871 | 201,485,816 | 13.50 | 83.93 | 95.59 | 86.89 |
| CK04 | 47.41659 | -88.46418 | 191,827,972 | 12.98 | 83.75 | 95.49 | 87.6 |
| CN01 | 49.67605 | -88.26014 | 255,236,148 | 16.56 | 84.12 | 96.82 | 87.56 |
| CN02 | 49.67605 | -88.26014 | 209,838,086 | 13.91 | 83.84 | 96.23 | 87.33 |
|  |  |  |  |  |  |  |  |

**Table S2** – Strain identification and sequencing statistics for *Salvelinus namaycush* samples. Resequencing statistics for each individual include total number of reads, average sequencing depth, breadth of the reference genome covered, the percentage of reads that aligned to the reference, and the percent of paired end reads that are correctly oriented to one another.

|  |  |  |  |  |  |  |
| --- | --- | --- | --- | --- | --- | --- |
| sample | strain | read count | average depth | breadth of coverage% | alignment% | proper pair% |
| LS01 | lean | 248,817,553 | 20.45 | 97.68 | 97.19 | 92.77 |
| LS02 | lean | 215,033,259 | 17.51 | 97.58 | 97.10 | 92.79 |
| LS05 | siscowet | 212,805,221 | 17.12 | 97.53 | 97.22 | 92.81 |
| LS07 | lean | 197,718,905 | 16.30 | 97.58 | 97.07 | 92.68 |
| LS08 | siscowet | 206,829,006 | 16.78 | 97.41 | 97.32 | 92.98 |
| LS09 | siscowet | 209,119,345 | 16.96 | 97.22 | 97.39 | 93.97 |
|  |  |  |  |  |  |  |


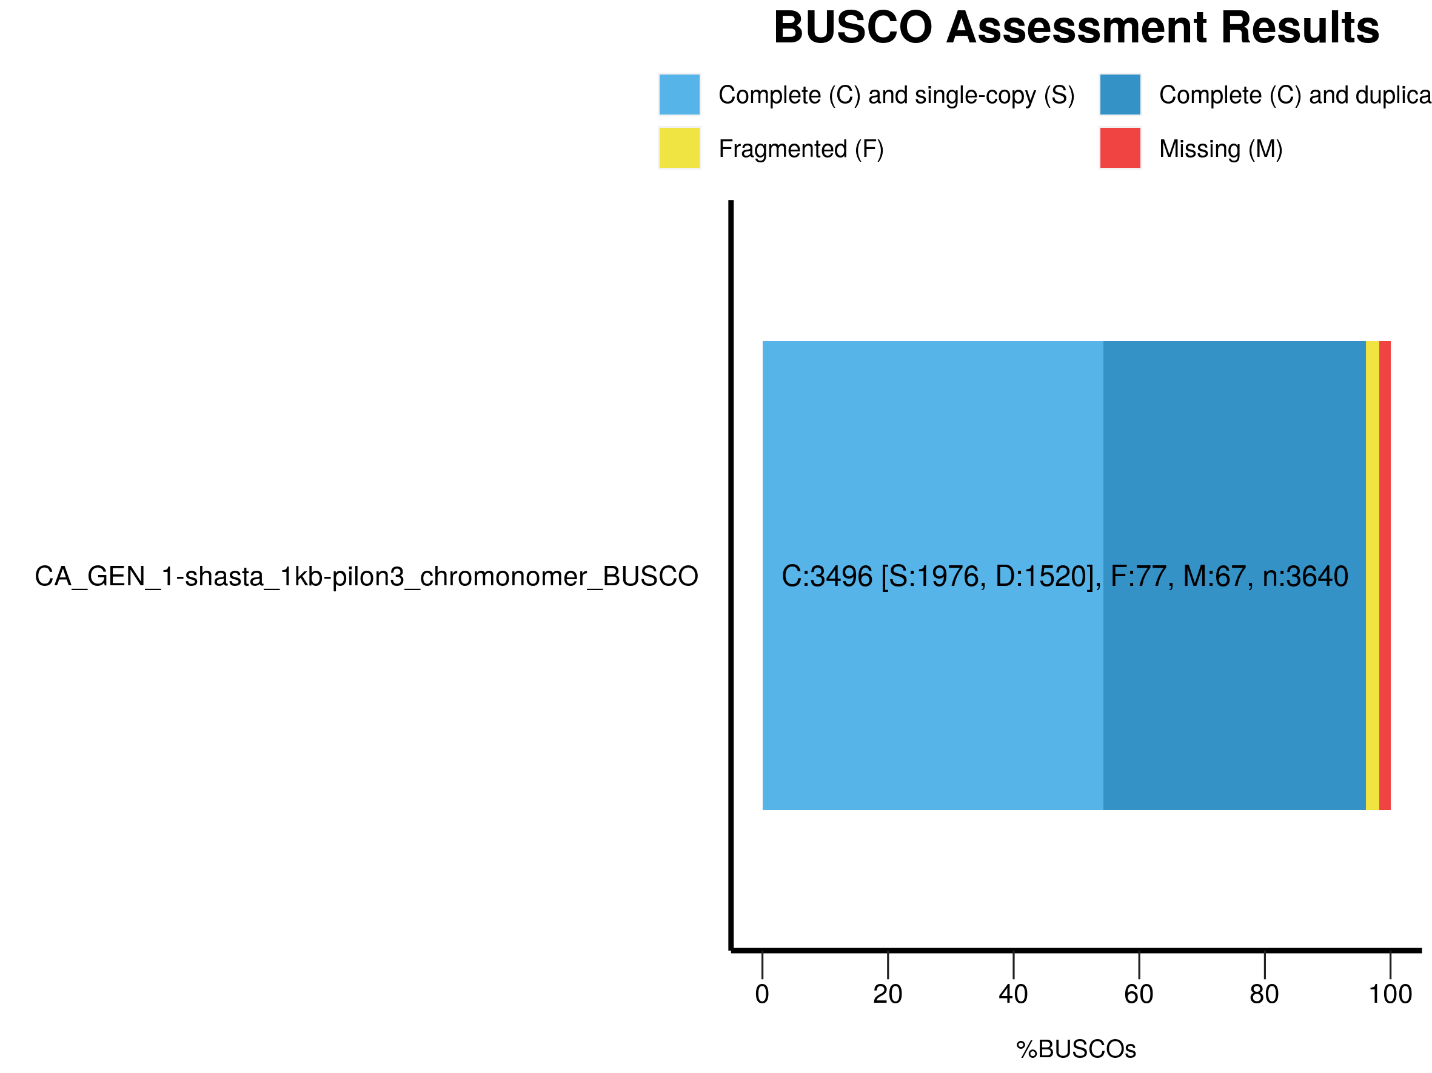


**Figure S1** – *Coregonus artedi* genome assembly BUSCO completeness following polishing with Pilon and scaffolding with Chromonomer.


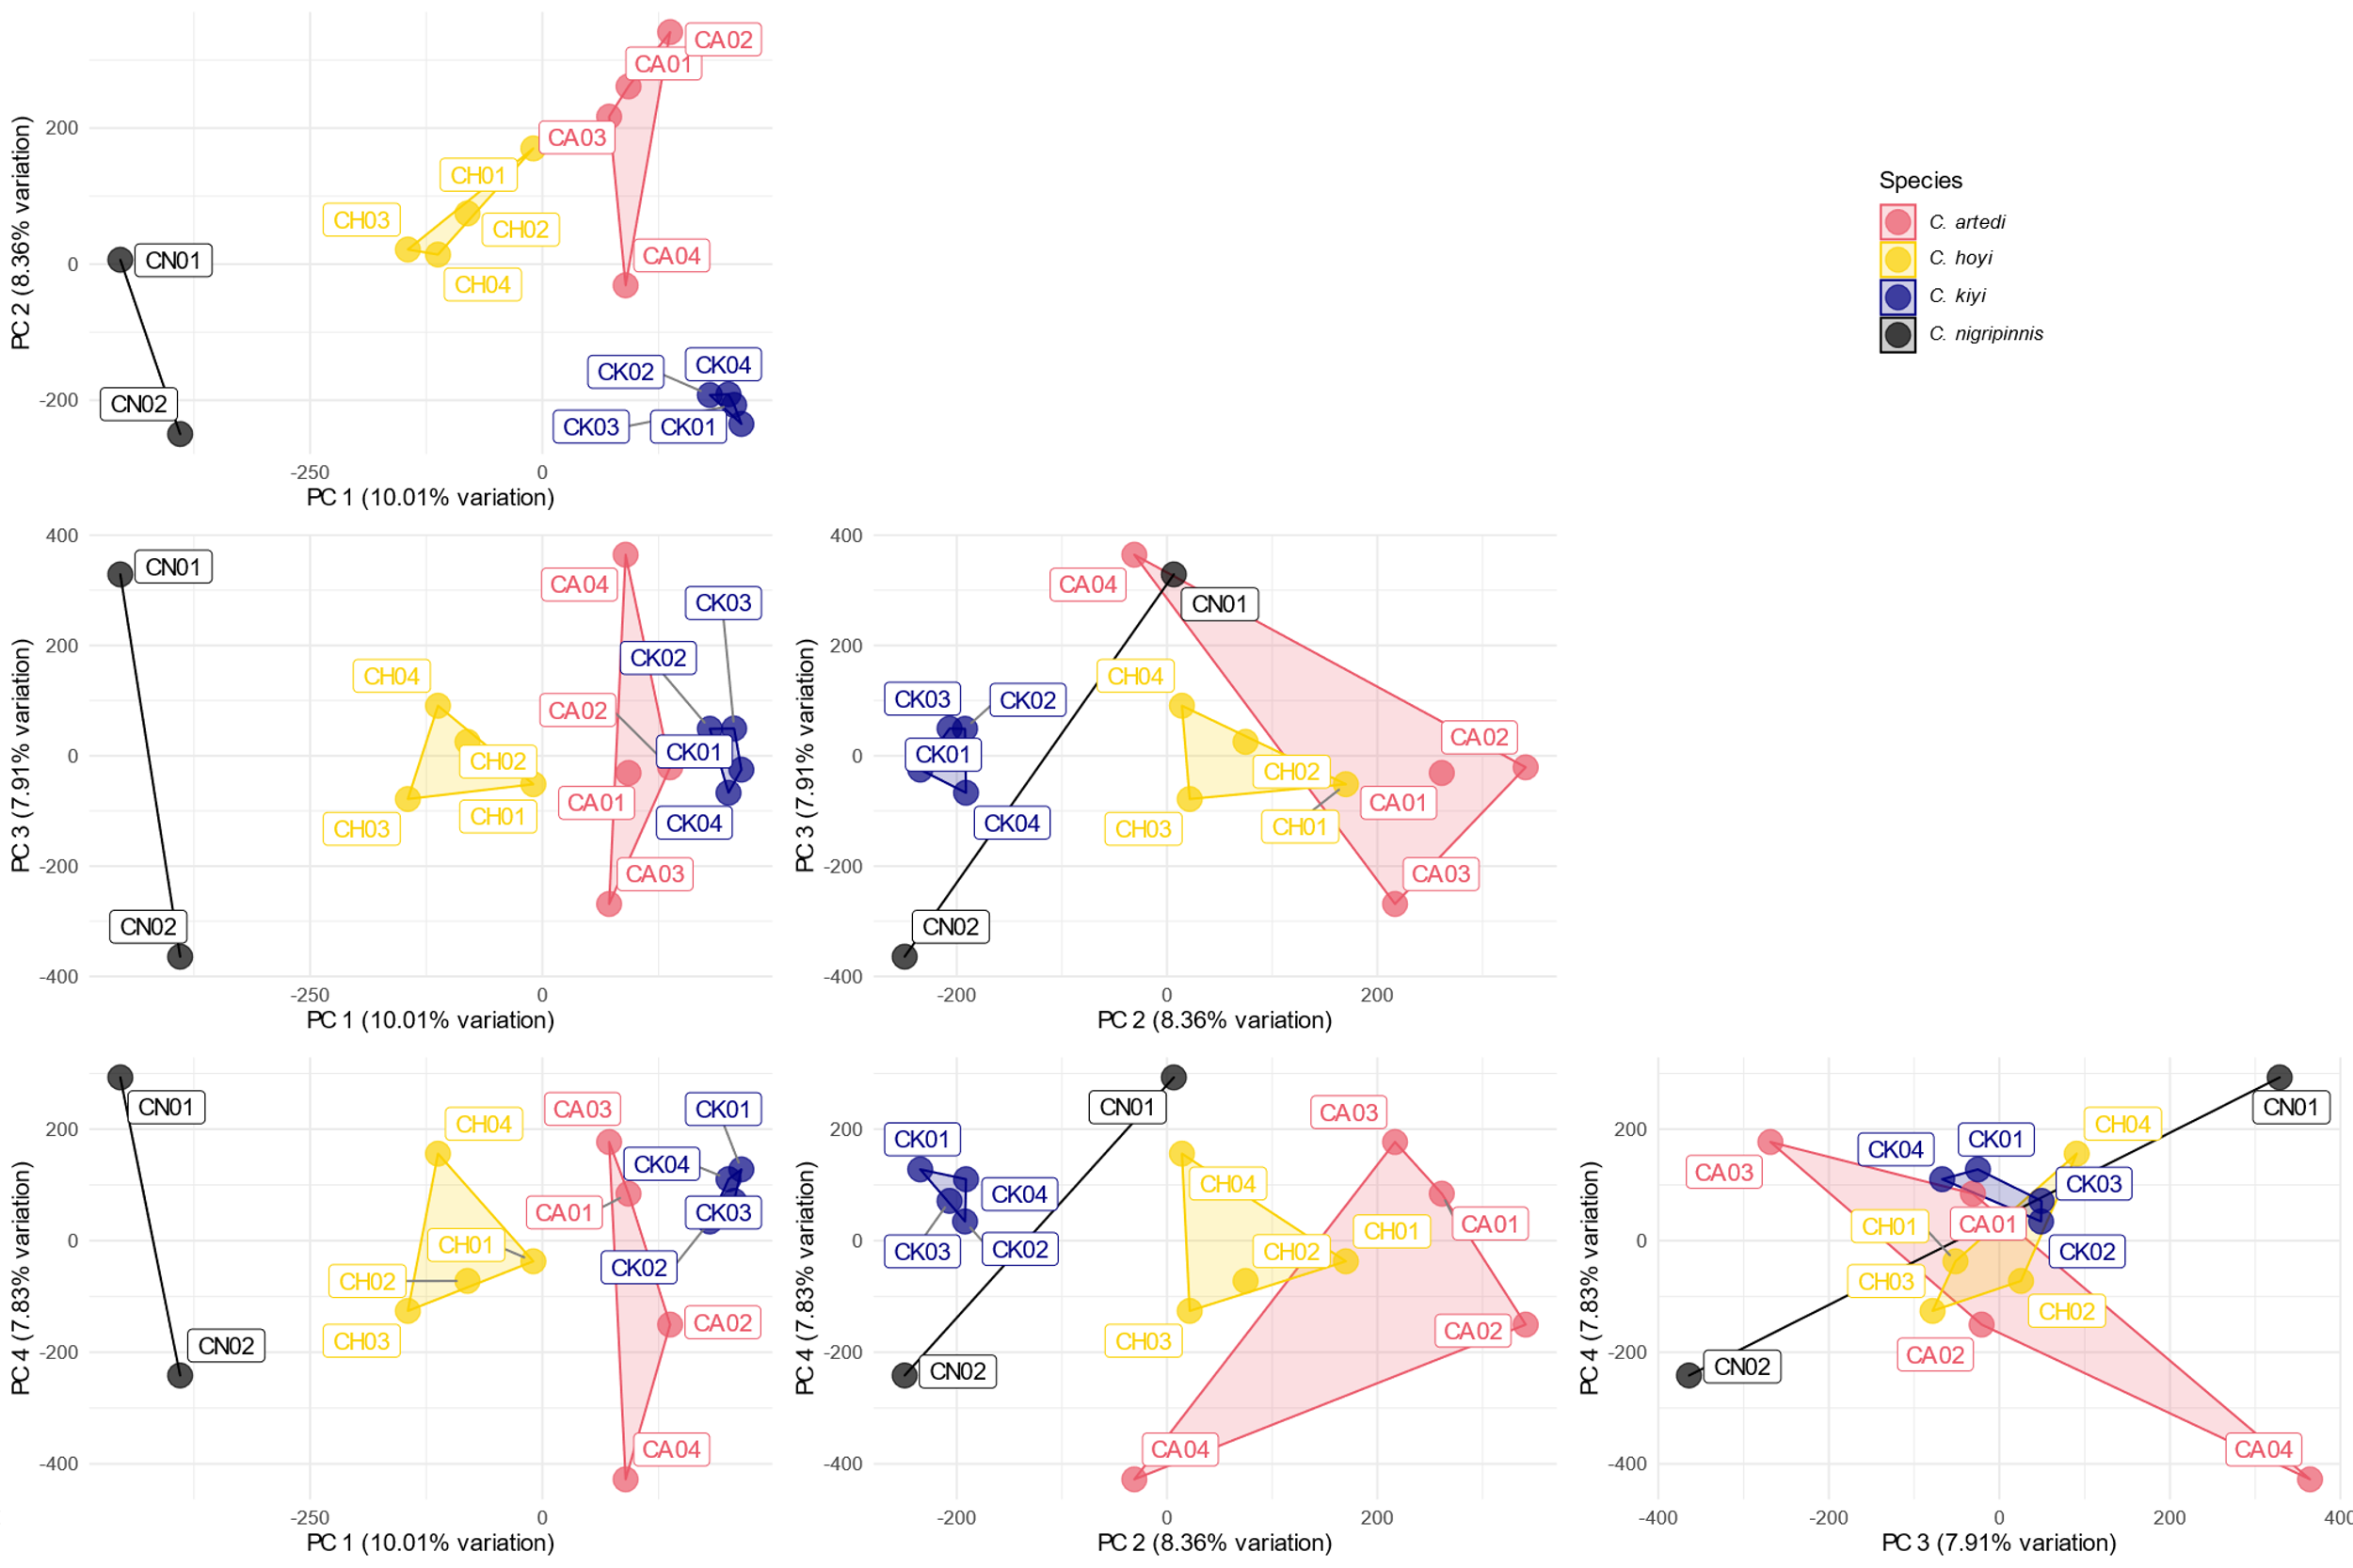


**Figure S2** – Principal component analysis plots of 4,090,641 bi-allelic SNPs from *C. artedi*, *C. hoyi*, *C. kiyi*, and *C. nigripinnis*.

**
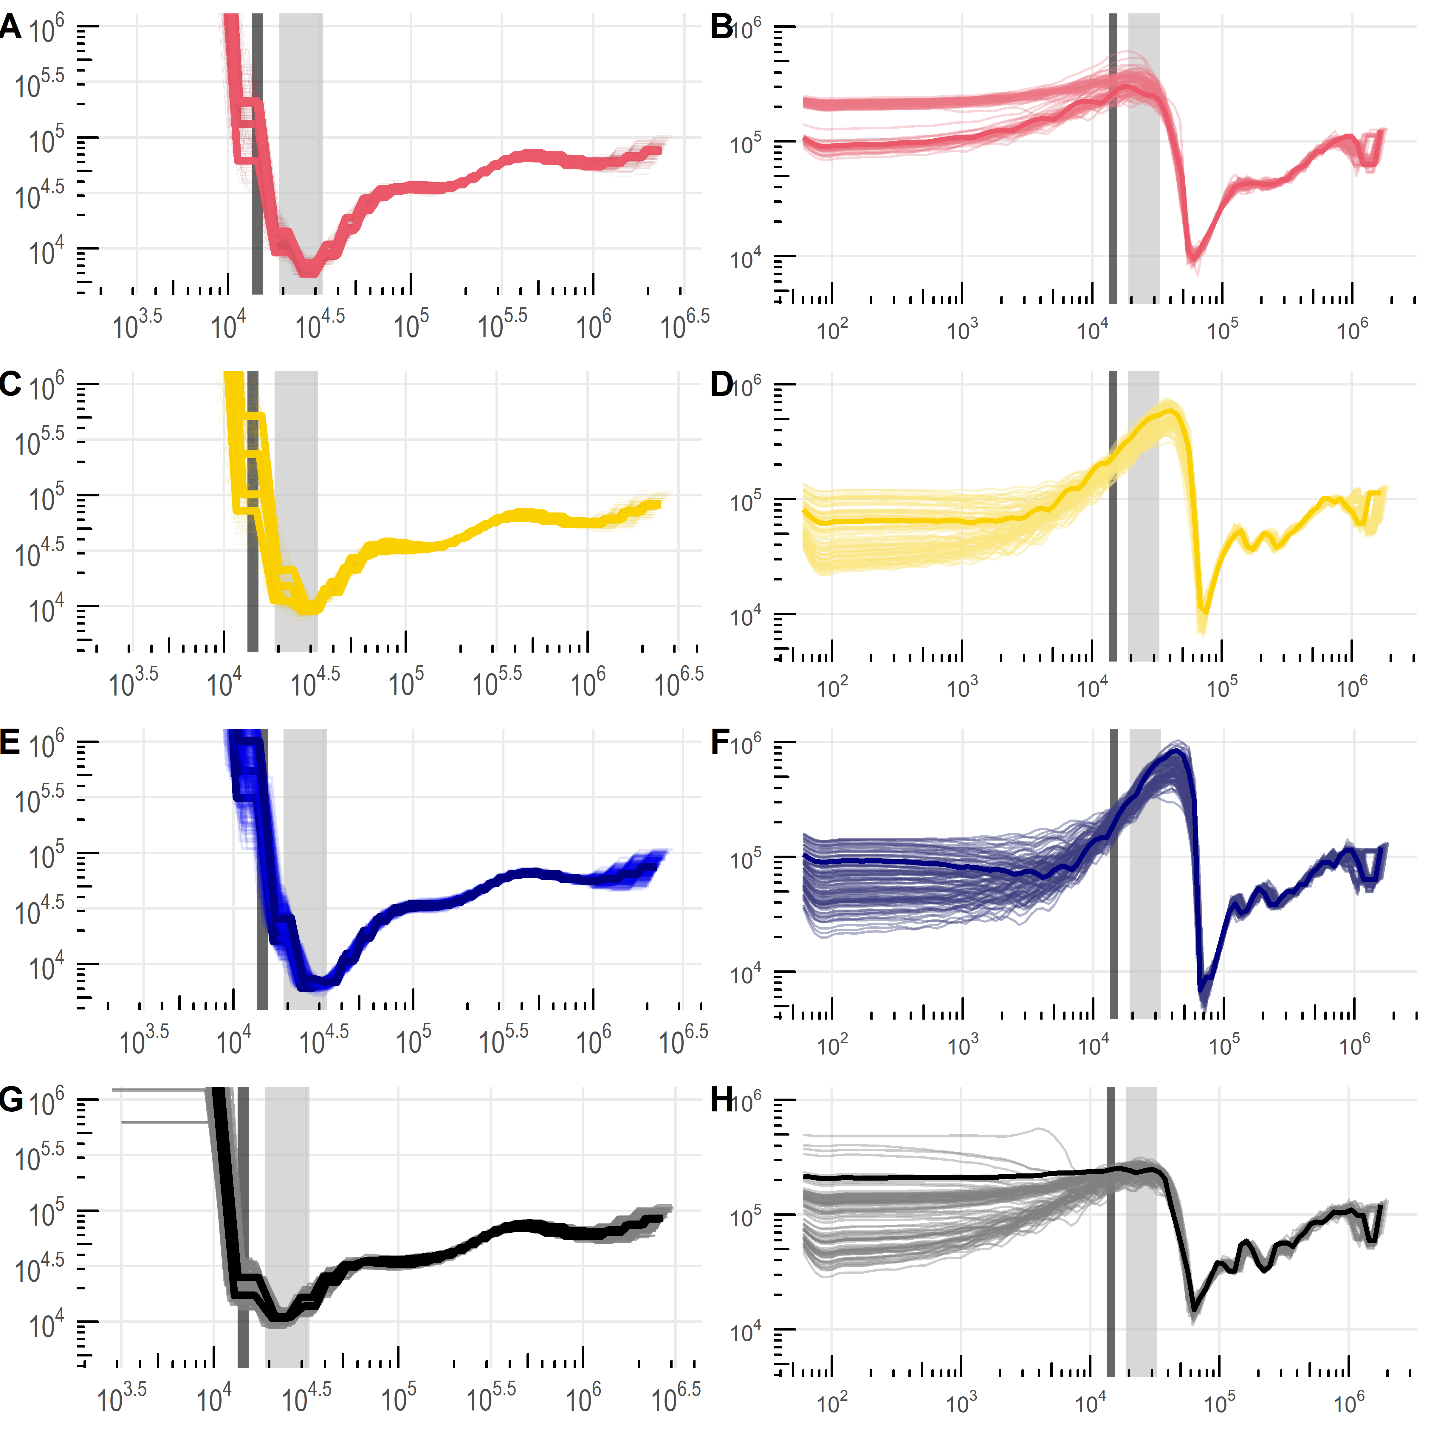
**

**Figure S3** – Inferred trajectories of effective population size through time using PSMC (left column) and SMC++(right column) for *Coregonus artedi* (**a,b**), *C. hoyi* (**c,d**), *C. kiyi* (**e,f**), *C. nigripinnis* (**g,h**). The light grey bar represents the time point of the last glacial maximum (19-33 ka) with the dark grey bar representing the time point when the Laurentide ice sheet was no longer covering the present borders of the Great Lakes (10.3 ka).


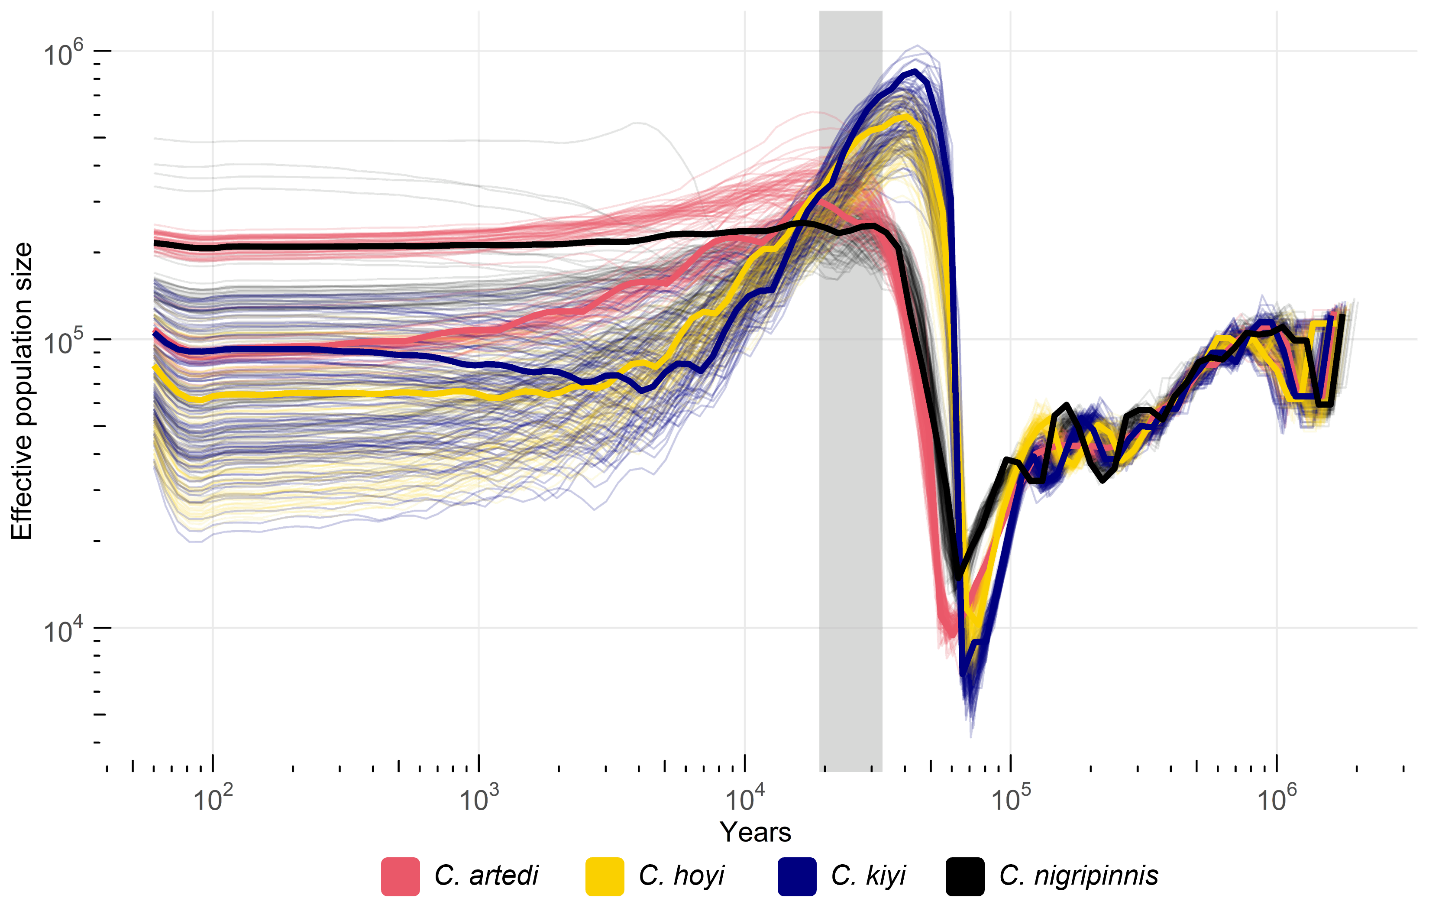


**Figure S4 –** Estimated SMC++ effective population size trajectories through time for four species of *Coregonus* (*C. artedi*, *C. hoyi*, *C. kiyi*, *C. nigripinnis*). Estimates of variation for each sample were estimated by running SMC++ with 100 bootstrap replicates from a 5 mb window of the genome. The generation time for all samples was set to six years and the mutation rate (µ) to 7.26e-09 mutations per site per generation. The light grey bar indicates the time range of the last glacial maximum (19-33 ka).


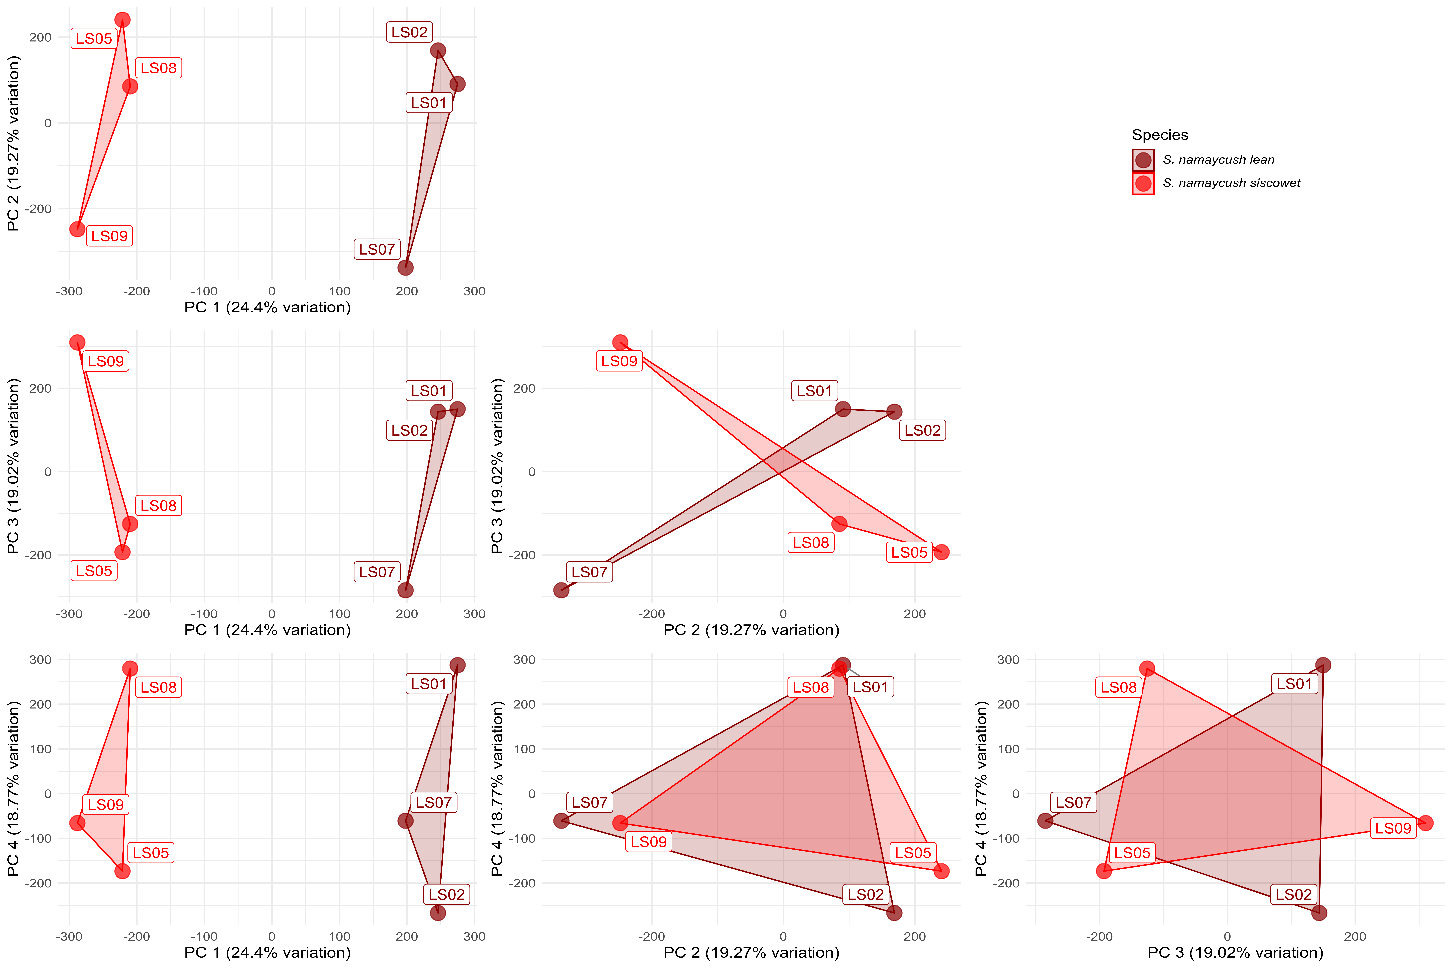


**Figure S5 –** Principal component analysis plots of 3,534,068 bi-allelic SNPs from *S. namaycush* lean and siscowet.


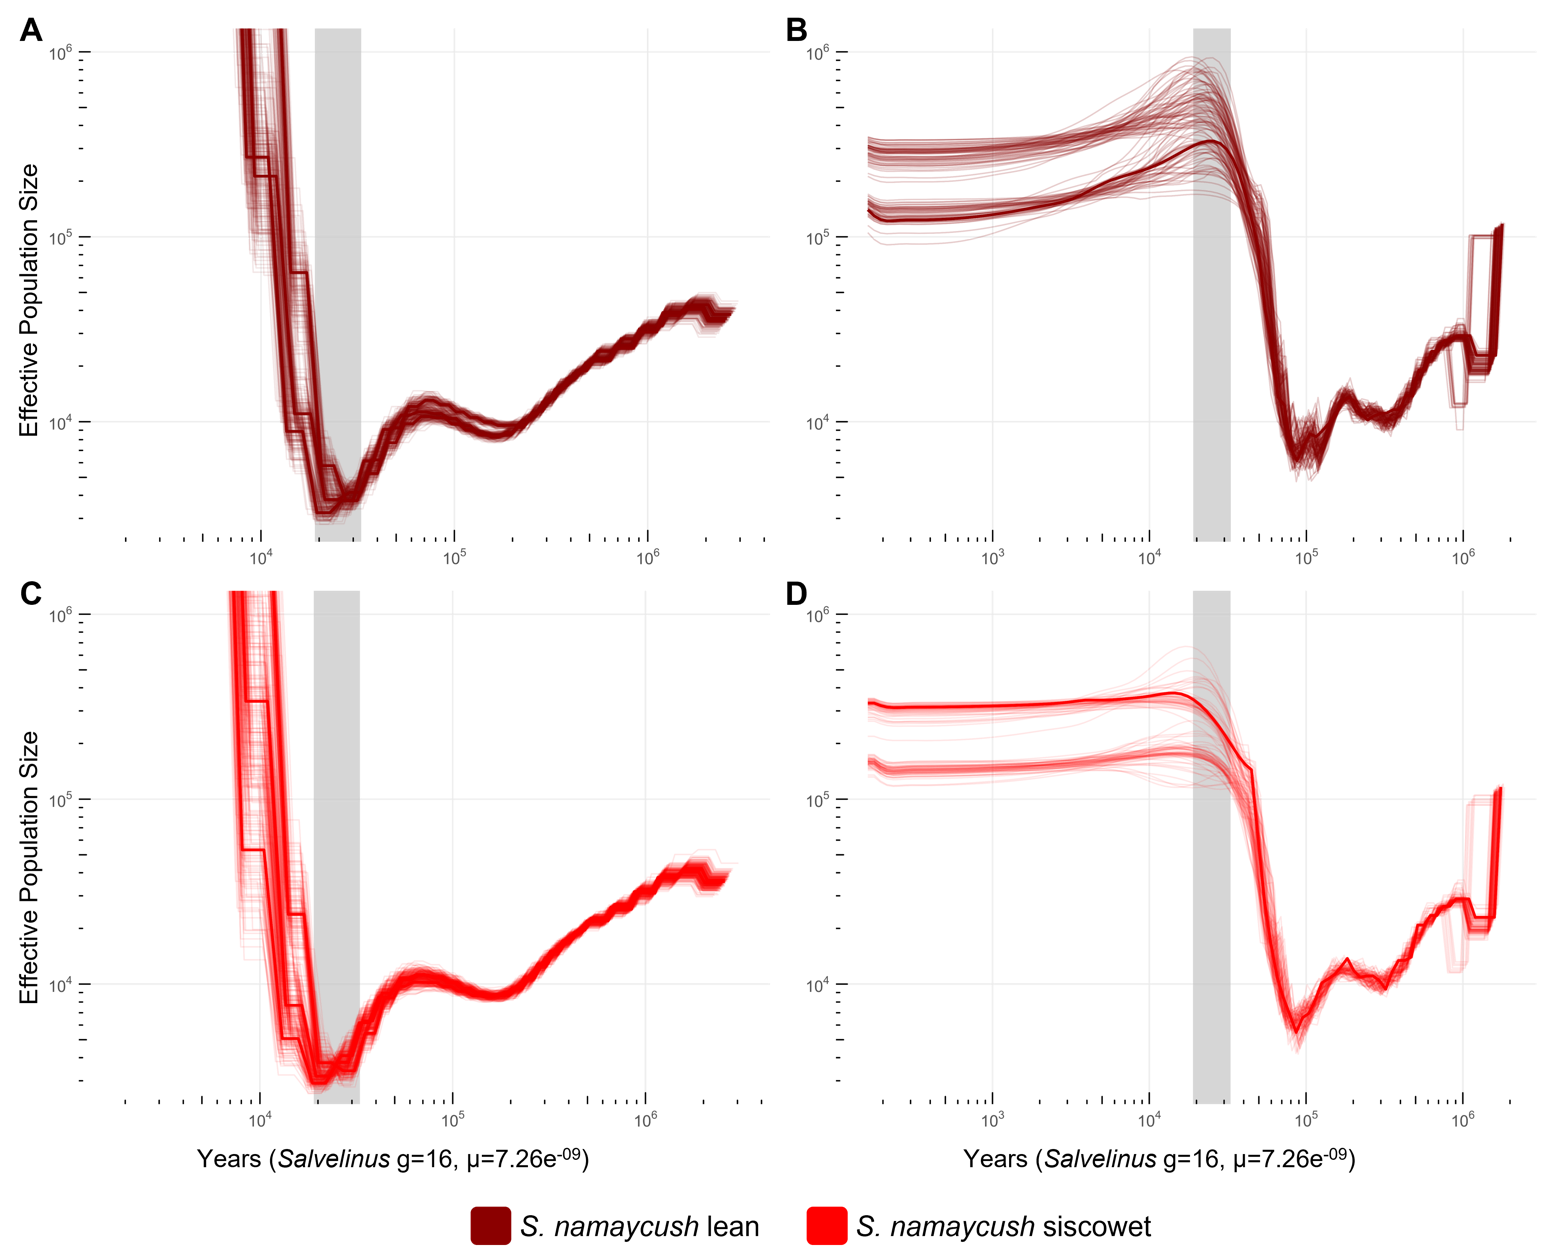


**Figure S6** – Estimated effective population sizes of *Salvelinus namaycush* lean (**a,b**) and siscowet (**c,d**) strain samples with 100 bootstrap replicates for each sample produced by PSMC (**a,c**) and SMC++ (**b,d**). The light grey bar represents the time range of the last glacial maximum (19-33 ka).


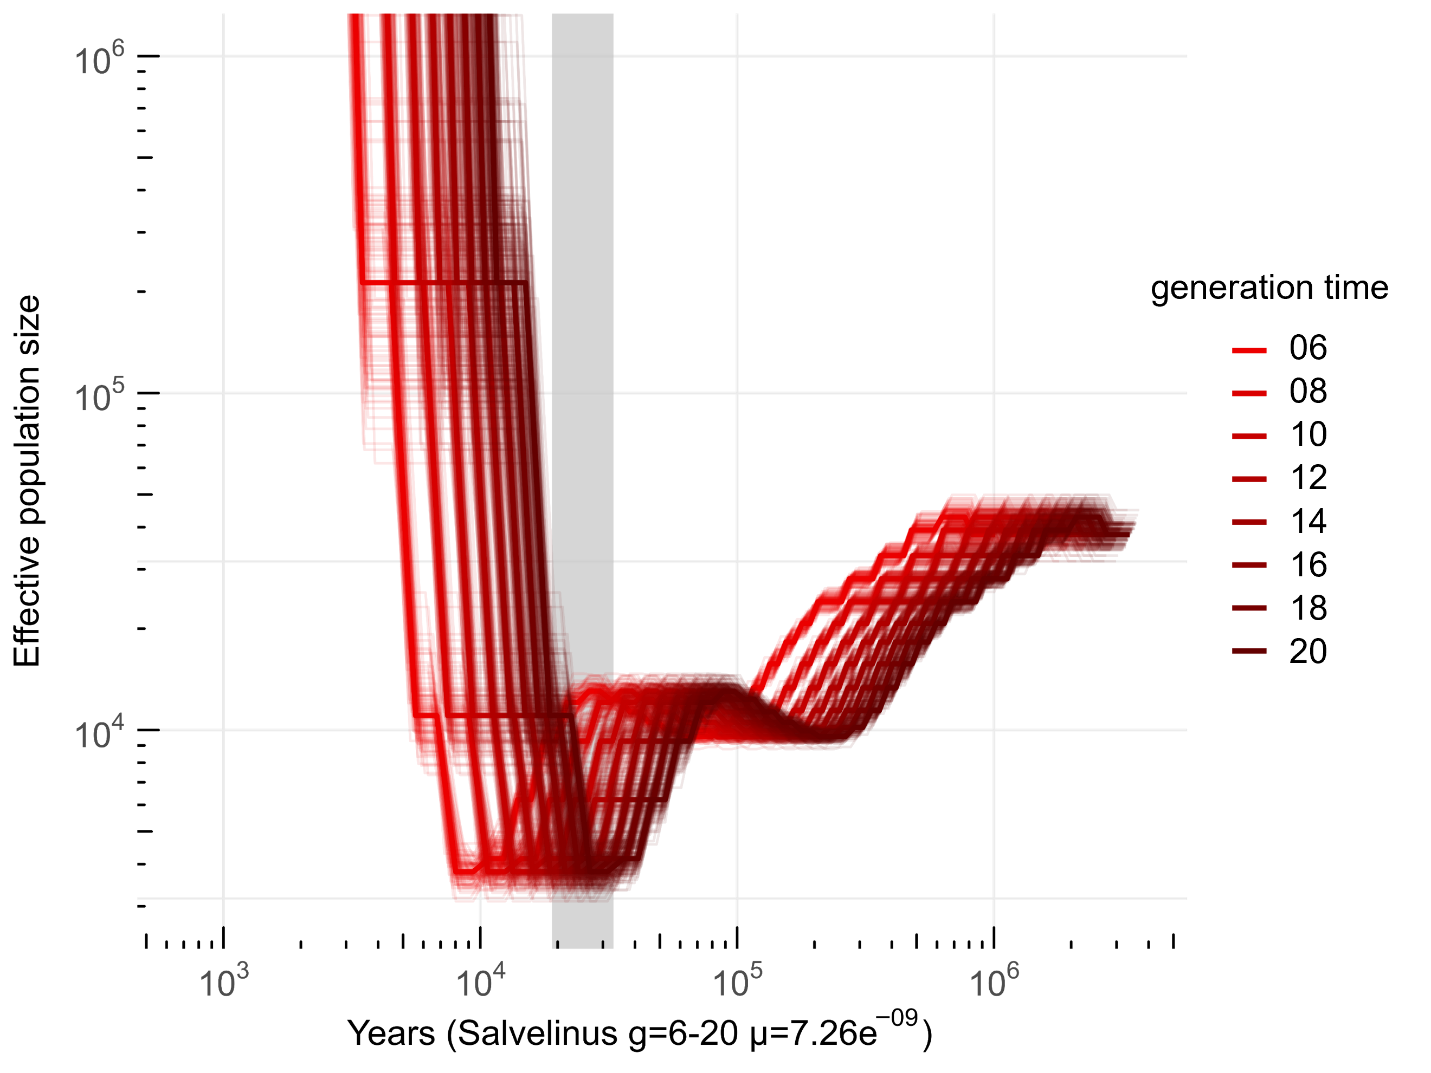
**Figure S7** – Estimated effective population size through time for one individual of the *S. namaycush* lean strain (LS01) from PSMC. Each set of lines indicates bootstrap replicates plotted with different generation times ranging from six to twenty years. Mutation rate parameters were set at a constant rate of 7.26e-09 mutations/site/generation.


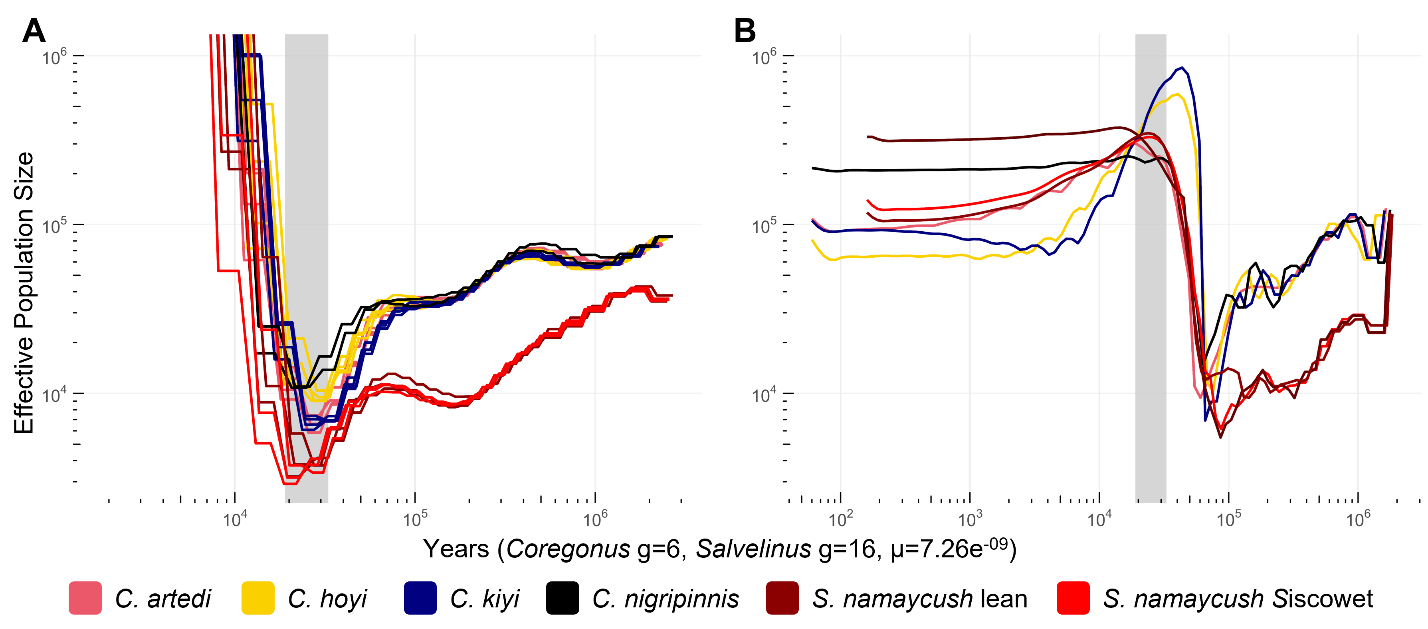


**Figure S8** – **a)** *Salvelinus namaycush* and *Coregonus* species estimates of effective population size using PSMC. **b)** Estimated effective population sizes using SMC++. For both salmonid species the mutation rate was set at 7.26e-09 mutations per site per generation. Generation times for *Coregonus* species and *S. namaycush* were set at 6 years and 16 years respectively. The light grey bar in both plots indicates the time range of the last glacial maximum (19-33 ka).

**SUPPLEMENTAL METHODS**

**Resequenced sample read statistics**

All Illumina reads for the resequenced *Coregonus* samples were concatenated for each individual and read counts for were calculated with seqkit ‘stats’ (Shen, Le, Li, & Hu, 2016). Following mapping and variant calling the average depth of coverage was generated from alignment data files using samtools ‘depth’. Also from the alignment files, the percentage of the reference genome that had reads mapped to it (breadth of coverage) were calculated using samtools ‘mpileup’. The alignment rate for all reads and proper pair reads for each individual were assessed with samtools ‘flagstat’

**Appendix I – Estimation of generation time of Lake Superior coregonines**

We used the method of Leslie (1966) to estimate mean generation time (*T*) using age-specific elements in a life table: /*R0,* where *x* = age in years, lx= age-specific relative survivorship, *mx* = age-specific fecundity, and *R0 =* .

We were able to acquire necessary information to model T for *C. artedi*, *C. hoyi*, and *C. kiyi*. To estimate relative survivorship by age, we used estimates of total instantaneous mortality rate (Z) provided by Pratt and Chong (2012) for Lake Superior (*C. artedi* Z = 0.321; *C. hoyi* Z = 0.322; *C. kiyi* Z = 0.487). Estimates of age-specific fecundity for *C. artedi* were obtained from Yule et al. (2020).

The development of life tables for *C. hoyi* and *C. kiyi* involved some additional steps. We used von Bertalanffy growth equations for these species (Pratt & Chong, 2012) which predicted fork length (FL) from age. We converted FL to total length (TL) based on measurements from digital images (*C. hoyi* TL/FL = 1.1011, N=45, length range = 83-310 mm TL; *C. kiyi* TL/FL = 1.095, N =37, length range = 9.4 – 25.9 mm). A *C. kiyi* total fecundity versus TL relationship was taken from Vinson et al. (2022). *C. hoyi* fecundity was obtained from Dryer and Beil (1968). These authors provided estimates of average *C. hoyi* fecundity in eight length bins, ranging from 21.3-29.7 mm TL (their Table 15). We developed a model predicting log (fecundity) from log (L) by weighting the bin estimates by sample size. The resulting model was as follows:

Log (Fecundity) = 2.7742 x Log (TL) – 0.1030: adjusted R2 = 0.91).

Predictions of TL at age for *C. hoyi* were used to predict age-specific fecundity with this relationship.

**Results**

The estimates of mean generation time of *C. artedi* equaled 6.41 years, *C. hoyi* was 6.32 years, and *C. kiyi* 5.96 years.

**Table 1** - Life table for Lake Superior *C. artedi*.

| Age (*x*) | Relative N (*lx)* | Fecundity (*mx)* | lxmx | xlxmx |
| --- | --- | --- | --- | --- |
| 3 | 1.0000 | 12,453 | 12,453 | 37,359 |
| 4 | 0.7254 | 15,797 | 11,460 | 45,838 |
| 5 | 0.5262 | 18,789 | 9,888 | 49,438 |
| 6 | 0.3817 | 21,429 | 8,180 | 49,083 |
| 7 | 0.2769 | 23,717 | 6,568 | 45,975 |
| 8 | 0.2009 | 25,653 | 5,153 | 41,227 |
| 9 | 0.1457 | 27,237 | 3,969 | 35,723 |
| 10 | 0.1057 | 28,469 | 3,010 | 30,096 |
| 11 | 0.0767 | 29,349 | 2,251 | 24,758 |
| 12 | 0.0556 | 29,877 | 1,662 | 19,945 |
| 13 | 0.0404 | 30,053 | 1,213 | 15,767 |
| 14 | 0.0293 | 29,877 | 875 | 12,245 |
| 15 | 0.0212 | 29,349 | 623 | 9,349 |
| 16 | 0.0154 | 28,469 | 439 | 7,017 |
| 17 | 0.0112 | 27,237 | 304 | 5,175 |
| 18 | 0.0081 | 25,653 | 208 | 3,744 |
| 19 | 0.0059 | 23,717 | 139 | 2,650 |
| 20 | 0.0043 | 21,429 | 91 | 1,828 |
| 21 | 0.0031 | 18,789 | 58 | 1,221 |
| 22 | 0.0022 | 15,797 | 35 | 780 |
| 23 | 0.0016 | 12,453 | 20 | 466 |
|  |  |  | 68,600 | 439,687 |
|  |  | Mean generation time (*T*) | | 6.41 |

**Table 2** - Life table for Lake Superior *C. hoyi*.

| Age (*x*) | Relative N (*lx)* | Fecundity (*mx)* | lxmx | xlxmx |
| --- | --- | --- | --- | --- |
| 3 | 1.0000 | 2,524 | 2,524 | 7,571 |
| 4 | 0.7247 | 2,791 | 2,023 | 8,090 |
| 5 | 0.5252 | 3,058 | 1,606 | 8,031 |
| 6 | 0.3806 | 3,324 | 1,265 | 7,592 |
| 7 | 0.2758 | 3,588 | 990 | 6,927 |
| 8 | 0.1999 | 3,848 | 769 | 6,153 |
| 9 | 0.1449 | 4,103 | 594 | 5,349 |
| 10 | 0.1050 | 4,352 | 457 | 4,569 |
| 11 | 0.0761 | 4,596 | 350 | 3,846 |
| 12 | 0.0551 | 4,833 | 266 | 3,197 |
| 13 | 0.0400 | 5,062 | 202 | 2,629 |
| 14 | 0.0290 | 5,285 | 153 | 2,142 |
| 15 | 0.0210 | 5,500 | 115 | 1,731 |
| 16 | 0.0152 | 5,707 | 87 | 1,389 |
| 17 | 0.0110 | 5,907 | 65 | 1,107 |
| 18 | 0.0080 | 6,098 | 49 | 877 |
| 19 | 0.0058 | 6,282 | 36 | 691 |
| 20 | 0.0042 | 6,459 | 27 | 542 |
| 21 | 0.0030 | 6,627 | 20 | 423 |
| 22 | 0.0022 | 6,789 | 15 | 329 |
| 23 | 0.0016 | 6,943 | 11 | 255 |
|  |  |  | 11,624 | 73,438 |
|  |  | Mean generation time (*T*) | | 6.32 |

**Table 3** - Life table for Lake Superior *C. kiyi*.

| Age (*x*) | Relative N (*lx)* | Fecundity (*mx)* | lxmx | xlxmx |
| --- | --- | --- | --- | --- |
| 4 | 1.0000 | 2,082 | 2,082 | 8,329 |
| 5 | 0.6145 | 2,330 | 1,432 | 7,158 |
| 6 | 0.3776 | 2,567 | 969 | 5,815 |
| 7 | 0.2320 | 2,794 | 648 | 4,538 |
| 8 | 0.1426 | 3,012 | 429 | 3,435 |
| 9 | 0.0876 | 3,220 | 282 | 2,539 |
| 10 | 0.0538 | 3,420 | 184 | 1,841 |
| 11 | 0.0331 | 3,611 | 119 | 1,314 |
| 12 | 0.0203 | 3,794 | 77 | 925 |
| 13 | 0.0125 | 3,970 | 50 | 644 |
| 14 | 0.0077 | 4,138 | 32 | 445 |
| 15 | 0.0047 | 4,299 | 20 | 304 |
| 16 | 0.0029 | 4,453 | 13 | 206 |
| 17 | 0.0018 | 4,601 | 8 | 139 |
| 18 | 0.0011 | 4,742 | 5 | 93 |
| 19 | 0.0007 | 4,878 | 3 | 62 |
| 20 | 0.0004 | 5,008 | 2 | 41 |
| 21 | 0.0003 | 5,132 | 1 | 27 |
| 22 | 0.0002 | 5,251 | 1 | 18 |
| 23 | 0.0001 | 5,366 | 1 | 12 |
|  |  |  | 6,359 | 37,885 |
|  |  | Mean generation time (*T*) | | 5.96 |

**REFERENCES**

Dryer, W. R., & Beil, J. (1968). Growth changes of the bloater (Coregonus hoyi) of the Apostle Islands region of Lake Superior. *Transactions of the American Fisheries Society, 97*(2), 146-158.

Leslie, P. (1966). The intrinsic rate of increase and the overlap of successive generations in a population of guillemots (Uria aalge Pont.). *Journal of Animal Ecology, 35*(2), 291-301.

Pratt, T., & Chong, S. (2012). Contemporary life history characteristics of Lake Superior deepwater ciscoes. *Aquatic Ecosystem Health & Management, 15*(3), 322-332.

Shen, W., Le, S., Li, Y., & Hu, F. (2016). SeqKit: a cross-platform and ultrafast toolkit for FASTA/Q file manipulation. *PloS one, 11*(10), e0163962.

Vinson, M. R., Herbert, M. E., Ackiss, A. S., Dobosenski, J. A., Evrard, L. M., Gorman, O. T., . . . Yule, D. L. (2022). Lake Superior Kiyi (Coregonus kiyi) reproductive biology. *Transactions of the American Fisheries Society, n/a*(n/a). doi:https://doi.org/10.1002/tafs.10389

Yule, D. L., Dobosenski, J. A., Myers, J. T., Ebener, M. P., Claramunt, R. M., McKenna, J. D., . . . Gorman, O. T. (2020). Does Fecundity of Cisco Vary in the Upper Great Lakes? *North American Journal of Fisheries Management, 40*(4), 973-985.
